# Supplementary material for: A neuroprotective phase precedes striatal degeneration upon nucleolar stress
Source: PubMed Central journal article supplement — Cell Death Differ. 2013 Jun 14;20(11):1455–64. doi: 10.1038/cdd.2013.66 (PMC3792439; doi:10.1038/cdd.2013.66), 2013-06-14

**A**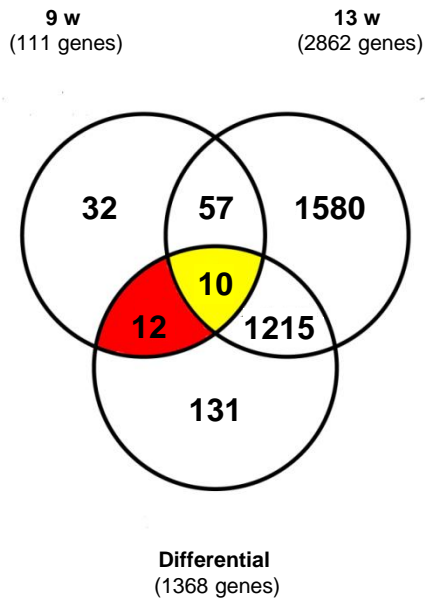

| Genes with significant age/genotype interaction |                     |                     |                    |
|-------------------------------------------------|---------------------|---------------------|--------------------|
| changed at 9 and 13 w                           |                     | changed only at 9 w |                    |
| <b>cluster I</b>                                | <b>cluster IV</b>   | <b>cluster II</b>   | <b>cluster III</b> |
| 2010004A03<br>Rik                               | LOC554327<br>Trim25 | Dhrs3               | Giyd2              |
| 5330417C22<br>Rik                               | Vim                 | Hip1                | Gprk6              |
| BC007180                                        |                     | Canx                | 6430543G08<br>Rik  |
| Epha7                                           |                     | Rasl11b             | Ccdc101            |
| Actn2                                           |                     |                     | Rassf7             |
| LOC676582                                       |                     |                     | Eif2c2             |
| Smpd3                                           |                     |                     | Pten               |
|                                                 |                     |                     | Top1mt             |

**B**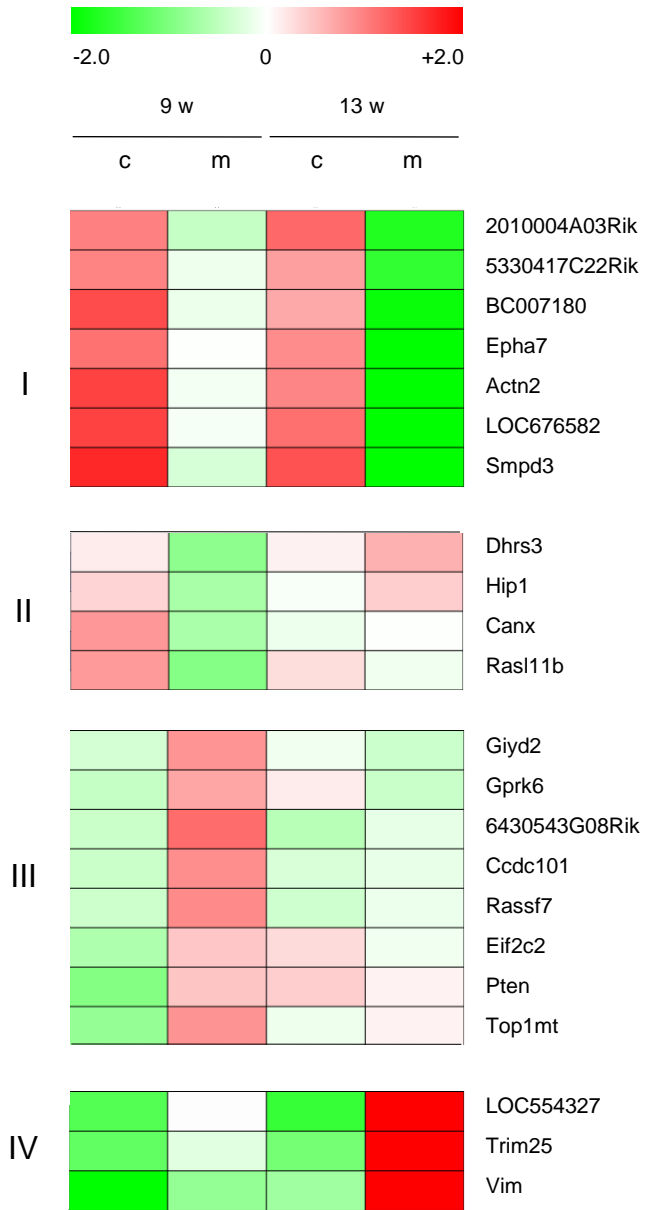**C**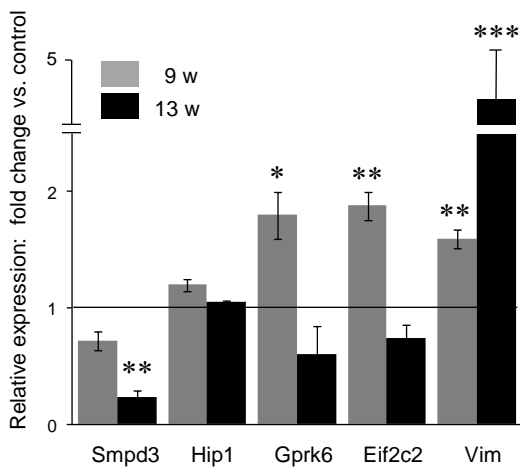**D**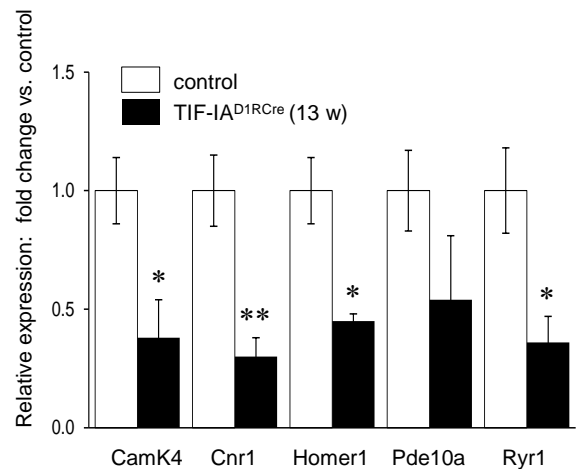

Supplement: cdd201366x6.pdf [file cdd201366x6.pdf]
