# Supplementary figures and images for: A neuroprotective phase precedes striatal degeneration upon nucleolar stress
Source: PubMed Central journal article supplement — Cell Death Differ. 2013 Jun 14;20(11):1455–64. doi: 10.1038/cdd.2013.66 (PMC3792439; doi:10.1038/cdd.2013.66), 2013-06-14

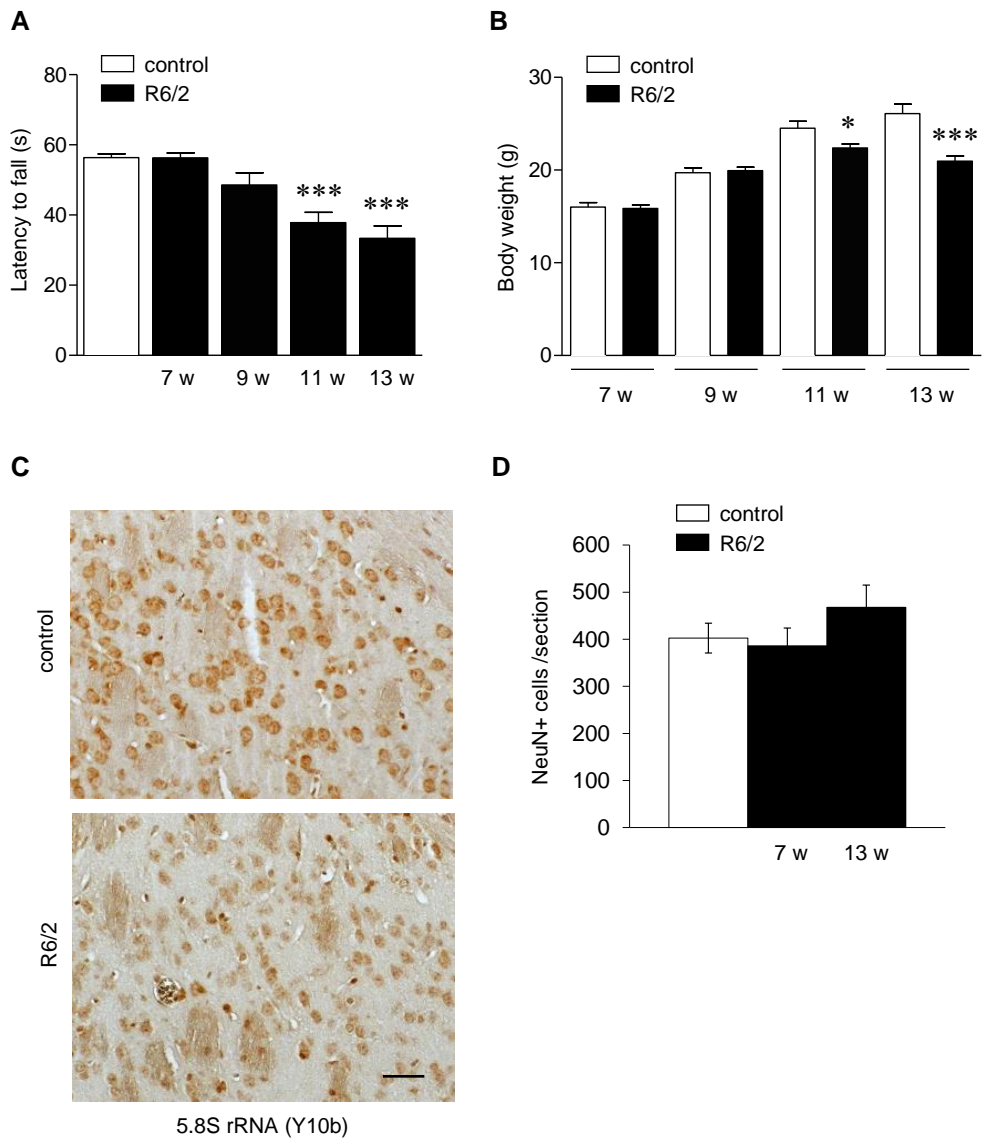

**Supplementary Figure 1**

Supplement: cdd201366x1.pdf [file cdd201366x1.pdf]

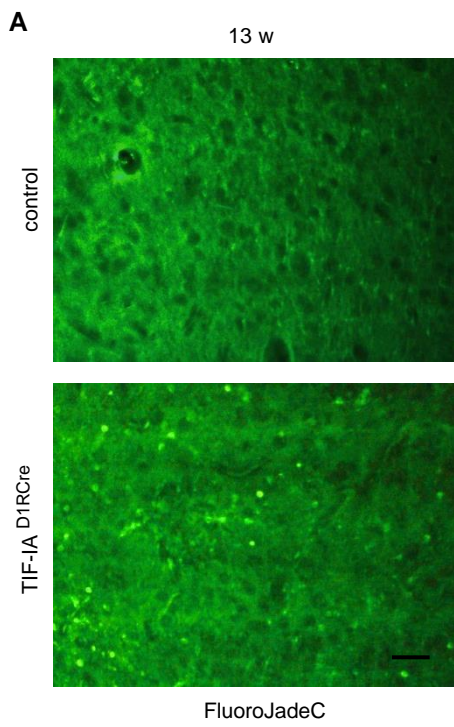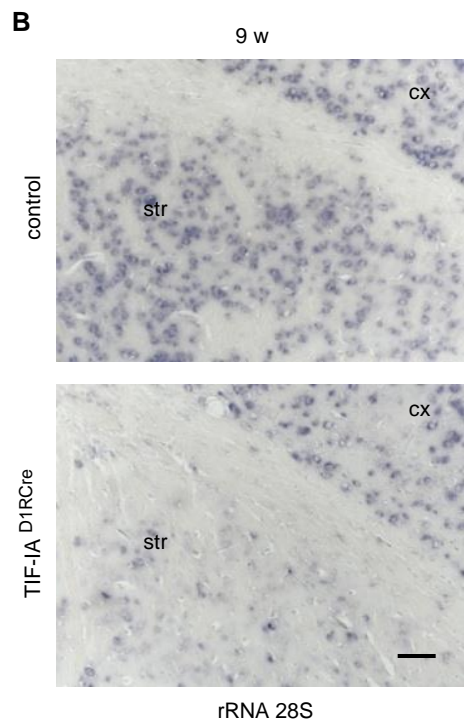

**Supplementary Figure 2**

Supplement: cdd201366x2.pdf [file cdd201366x2.pdf]

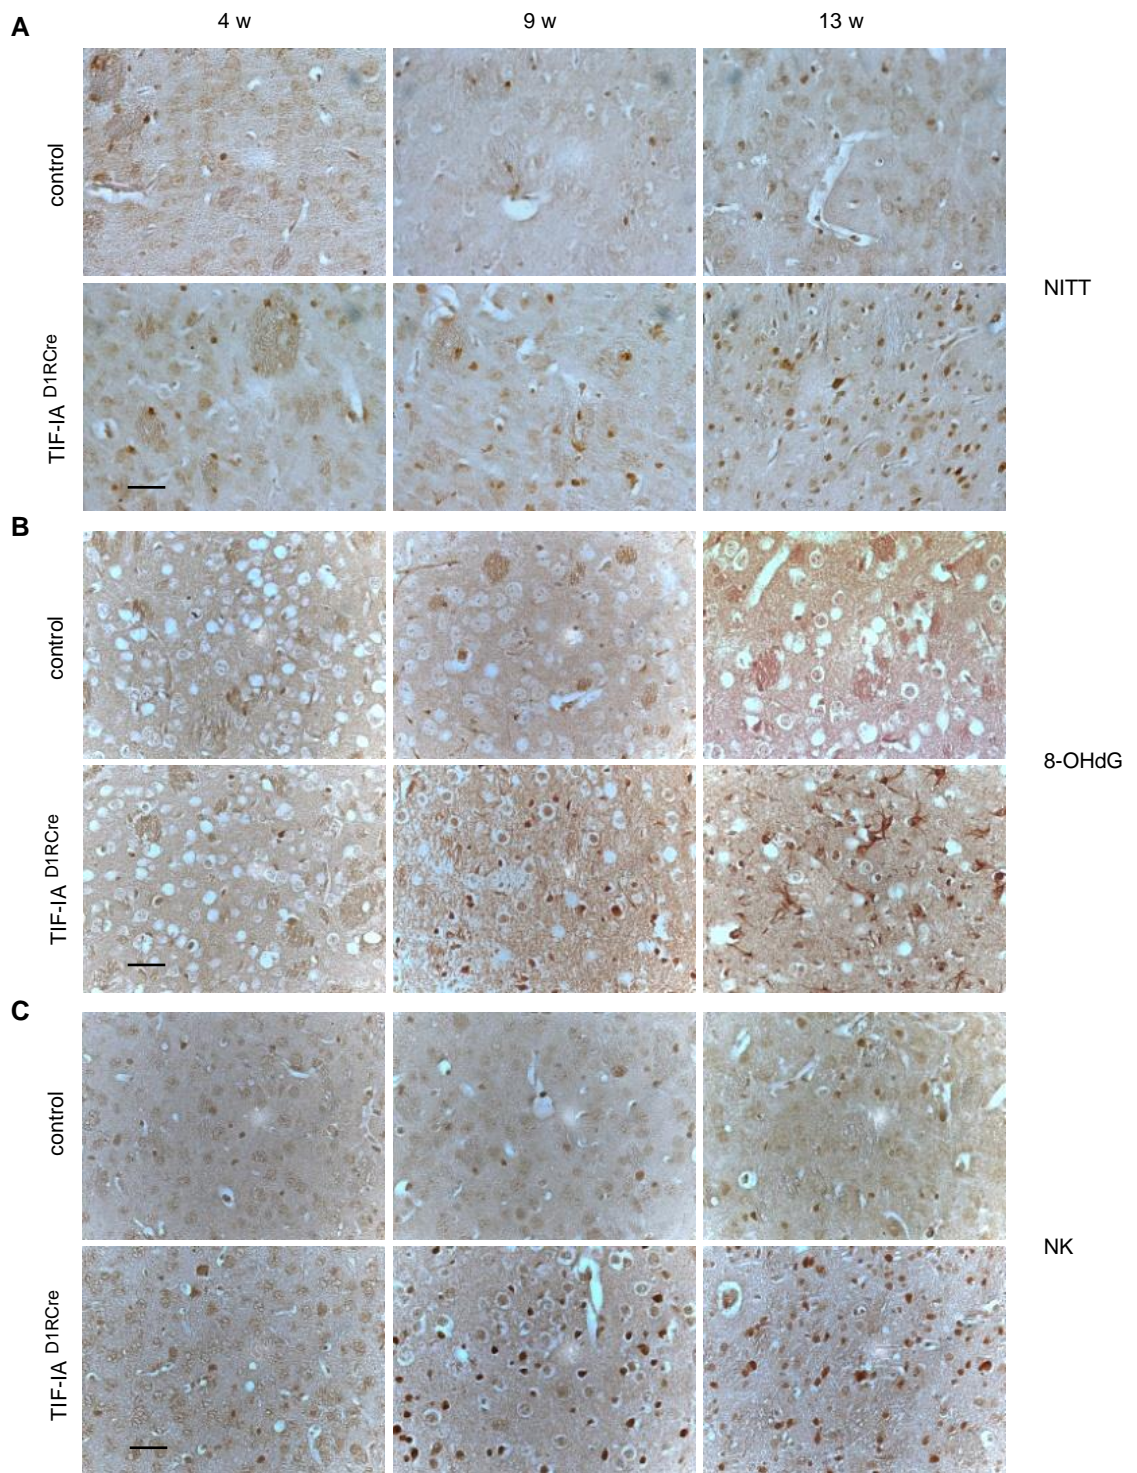

Supplementary Figure 3

Supplement: cdd201366x3.pdf [file cdd201366x3.pdf]

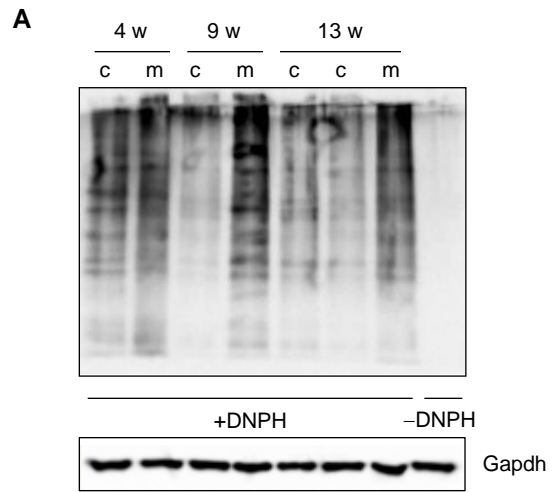

**Supplementary Figure 4**

Supplement: cdd201366x4.pdf [file cdd201366x4.pdf]

**A**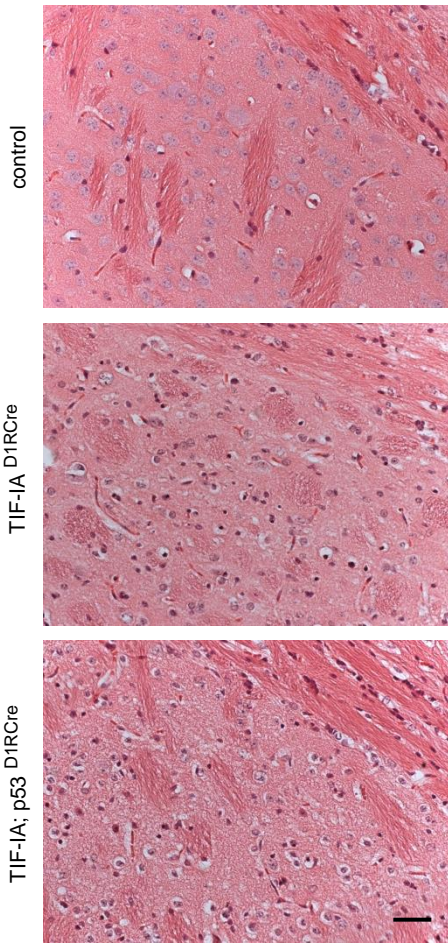**B**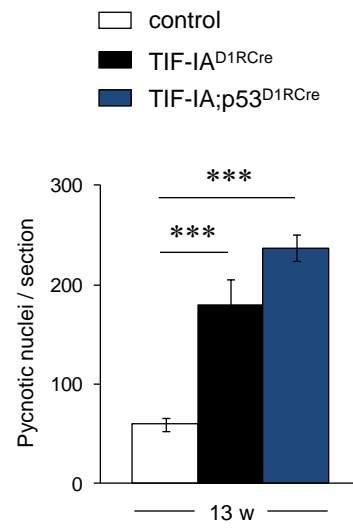**Supplementary Figure 5**

Supplement: cdd201366x5.pdf [file cdd201366x5.pdf]

**A**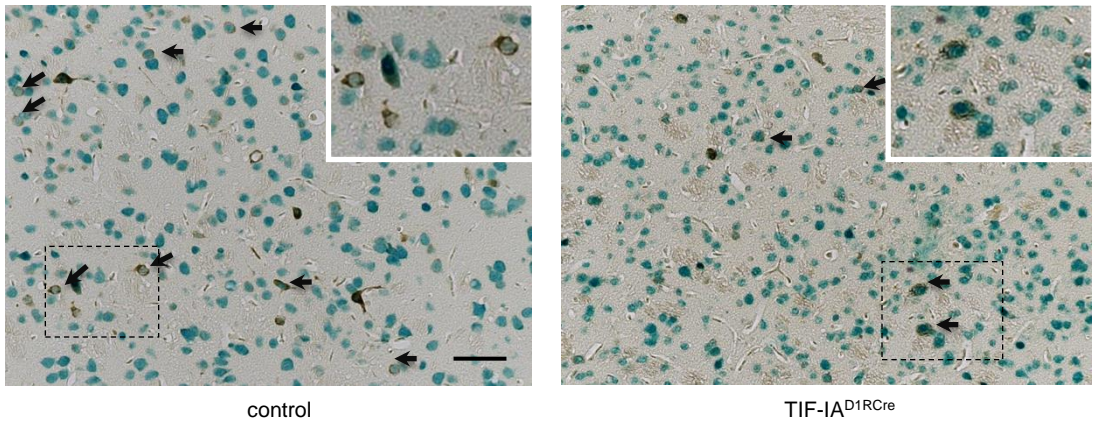**B**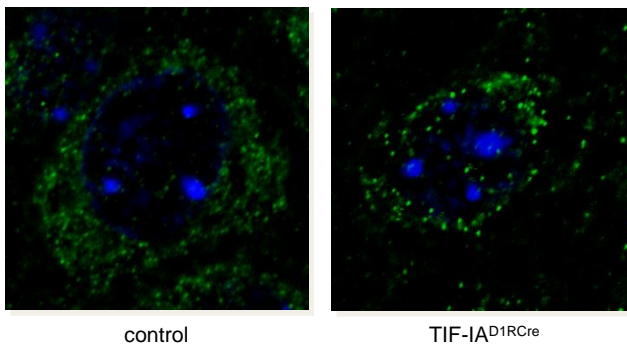**C**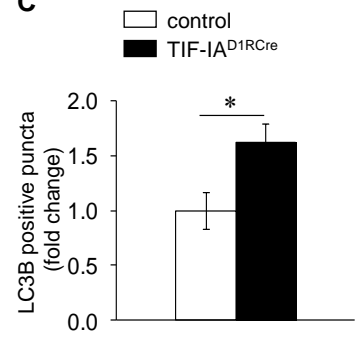**D**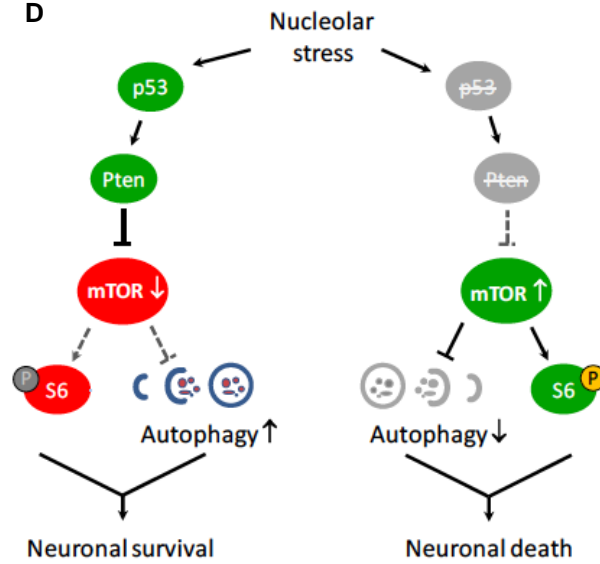

Supplementary Figure 7

Supplement: cdd201366x7.pdf [file cdd201366x7.pdf]
